# Supplementary material for: Expression Profiling of CYP1B1 in Oral Squamous Cell Carcinoma: Counterintuitive Downregulation in Tumors
Source: PubMed Central journal article supplement (PMC3218060; doi:10.1371/journal.pone.0027914), 2011-11-16
Supplement: pone.0027914.s002.pdf [file pone.0027914.s002.pdf]

Supplementary Table S1

| Sr. No | Patient no. | Age/ Sex | TNM                                            | Site of lesion            | Habits                                | CYP1B1 expression (mRNA) | CYP1B1 expression (protein) |
|--------|-------------|----------|------------------------------------------------|---------------------------|---------------------------------------|--------------------------|-----------------------------|
| 1      | 8           | 50F      | T <sub>3</sub> N <sub>1</sub> M <sub>0</sub>   | Lower alveolus            | Tobacco chewing                       | N>T                      | -                           |
| 2      | 15          | 51F      | T <sub>3</sub> N <sub>1</sub> M <sub>0</sub>   | BM                        | Tobacco, areca nut, betel nut chewing | N>T                      | -                           |
| 3      | 19          | 48F      | T <sub>4</sub> N <sub>2b</sub> M <sub>0</sub>  | BM                        | Betel quid chewing                    | ns                       | -                           |
| 4      | 20          | 50F      | T <sub>4</sub> N <sub>1</sub> M <sub>0</sub>   | BM                        | Betel nut chewing                     | N>T                      | -                           |
| 5      | 50          | 50M      | T <sub>4</sub> N <sub>2b</sub> M <sub>0</sub>  | BM                        | Tobacco chewing                       | N>T                      | -                           |
| 6      | 53          | 38F      | T <sub>1</sub> N <sub>0</sub> M <sub>0</sub>   | BM                        | Tobacco chewing                       | N>T                      | -                           |
| 7      | 56          | 50F      | ED                                             | BM                        | Tobacco chewing                       | N>T                      | -                           |
| 8      | 57          | 62F      | T <sub>1</sub> N <sub>0</sub> M <sub>0</sub>   | BM                        | Tobacco chewing                       | N>T                      | -                           |
| 9      | 59          | 70F      | T <sub>3</sub> N <sub>1</sub> M <sub>0</sub>   | Retromolar trigone        | Betel nut chewing                     | N>T                      | -                           |
| 10     | 63          | 40F      | T <sub>4a</sub> N <sub>1</sub> M <sub>x</sub>  | BM                        | Betel nut chewing                     | ns                       | N>T (WB)                    |
| 11     | 65          | 55F      | T <sub>2</sub> N <sub>1</sub> M <sub>x</sub>   | BM                        | Tobacco chewing                       | N>T                      | N>T (WB)                    |
| 12     | 67          | 38F      | T <sub>2</sub> N <sub>1</sub> M <sub>0</sub>   | BM                        | Tobacco chewing                       | N>T                      | -                           |
| 13     | 69          | 70F      | T <sub>2</sub> N <sub>1</sub> M <sub>0</sub>   | BM                        | Tobacco chewing                       | N>T                      | -                           |
| 14     | 79          | 67F      | T <sub>3</sub> N <sub>1</sub> M <sub>x</sub>   | BM                        | Tobacco chewing                       | N>T                      | N>T (WB)                    |
| 15     | 80          | 67F      | T <sub>4</sub> N <sub>0</sub> M <sub>0</sub>   | Floor of the mouth        | Tobacco chewing                       | N>T                      | -                           |
| 16     | 92          | 50F      | T <sub>4a</sub> N <sub>2b</sub> M <sub>0</sub> | BM                        | Tobacco chewing                       | N>T                      | N>T (WB)                    |
| 17     | 101         | 48F      | T <sub>2</sub> N <sub>1</sub> M <sub>x</sub>   | BM                        | Tobacco chewing                       | N>T                      | N>T (WB)                    |
| 18     | 109         | 45M      | T <sub>3</sub> N <sub>1</sub> M <sub>0</sub>   | BM                        | Tobacco chewing                       | N>T                      | -                           |
| 19     | 110         | 45M      | T <sub>2</sub> N <sub>1</sub> M <sub>0</sub>   | BM                        | Smoking and alcohol                   | N>T                      | N>T (WB)                    |
| 20     | 113         | 80F      | T <sub>1</sub> N <sub>0</sub> M <sub>0</sub>   | BM                        | Betel nut chewing                     | N>T                      | -                           |
| 21     | 115         | 55F      | T <sub>4</sub> N <sub>1</sub> M <sub>0</sub>   | BM                        | Tobacco chewing                       | N>T                      | -                           |
| 22     | 116         | 40M      | T <sub>4</sub> N <sub>0</sub> M <sub>0</sub>   | BM and retromolar trigone | Tobacco chewing                       | N>T                      | -                           |
| 23     | 128         | 60F      | T <sub>2</sub> N <sub>0</sub> M <sub>0</sub>   | BM                        | Tobacco chewing                       | N>T                      | -                           |
| 24     | 135         | 41M      | T <sub>2</sub> N <sub>0</sub> M <sub>0</sub>   | BM                        | Betel quid chewing                    | N<T                      | N>T (WB)                    |
| 25     | 136         | 50F      | T <sub>1</sub> N <sub>0</sub> M <sub>0</sub>   | Tongue                    | Nil                                   | -                        | N>T (IHC)                   |
| 26     | 139         | 71F      | T <sub>1</sub> N <sub>1</sub> M <sub>0</sub>   | BM                        | Tobacco chewing                       | N>T                      | N>T (IHC)                   |
| 27     | 140         | 70M      | T <sub>4</sub> N <sub>1</sub> M <sub>0</sub>   | Lip                       | Tobacco chewing                       | N>T                      | N>T (WB)                    |
| 28     | 142         | 62M      | T <sub>3</sub> N <sub>0</sub> M <sub>0</sub>   | Floor of the mouth        | Cigarette smoking                     | -                        | N>T (IHC)                   |
| 29     | 143         | 43M      | T <sub>3</sub> N <sub>1</sub> M <sub>0</sub>   | BM                        | Tobacco chewing                       | N>T                      | N>T (IHC)                   |
| 30     | 144         | 40M      | T <sub>2</sub> N <sub>1</sub> M <sub>0</sub>   | BM and angle of the mouth | Cigarette smoking                     | N>T                      | N>T (IHC)                   |
| 31     | 149         | 50M      | T <sub>4</sub> N <sub>2c</sub> M <sub>x</sub>  | BM                        | Tobacco chewing                       | -                        | N>T (WB)                    |
| 32     | 156         | 75M      | T <sub>2</sub> N <sub>0</sub> M <sub>0</sub>   | Tongue                    | Tobacco chewing                       | N<T                      | -                           |
| 33     | 162         | 55F      | T <sub>2</sub> N <sub>0</sub> M <sub>0</sub>   | BM                        | Tobacco chewing                       | -                        | N>T (WB)                    |
| 34     | 178         | 50M      | T <sub>1</sub> N <sub>0</sub> M <sub>0</sub>   | Tongue                    | Nil                                   | -                        | N>T (IHC)                   |
| 35     | 184         | 38M      | T <sub>2</sub> N <sub>1</sub> M <sub>0</sub>   | Tongue                    | Betel nut chewing and alcohol         | -                        | N>T (WB)                    |
| 36     | 185         | 56M      | T <sub>3</sub> N <sub>0</sub> M <sub>0</sub>   | BM                        | Nil                                   | -                        | N>T (IHC)                   |
| 37     | 187         | 83M      | T <sub>3</sub> N <sub>0</sub> M <sub>0</sub>   | Maxilla                   | Cigarette smoking                     | -                        | N>T (WB)                    |
| 38     | 188         | 33M      | T <sub>3</sub> N <sub>0</sub> M <sub>0</sub>   | Palate                    | Nil                                   | -                        | N>T (WB)                    |
| 39     | 194         | 48F      | T <sub>3</sub> N <sub>0</sub> M <sub>0</sub>   | Gingivobuccal sulcus      | Tobacco chewing                       | -                        | N>T (WB)                    |
| 40     | 197         | 59M      | T <sub>2</sub> N <sub>0</sub> M <sub>0</sub>   | BM                        | Cigarette smoking and alcohol         | -                        | N>T (WB)                    |
| 41     | 199         | 50M      | T <sub>4a</sub> N <sub>2b</sub> M <sub>0</sub> | BM                        | Tobacco chewing                       | -                        | N>T (WB)                    |
| 42     | 206         | 44M      | T <sub>3</sub> N <sub>2b</sub> M <sub>0</sub>  | Tongue                    | Tobacco chewing                       | -                        | N>T (WB)                    |
| 43     | 213         | 37M      | T <sub>3</sub> N <sub>0</sub> M <sub>0</sub>   | Tongue                    | Nil                                   | -                        | N>T (WB)                    |
| 44     | 219         | 68M      | T <sub>3</sub> N <sub>1</sub> M <sub>0</sub>   | BM                        | Tobacco chewing                       | -                        | N>T (WB)                    |
| 45     | 225         | 53F      | T <sub>4</sub> N <sub>0</sub> M <sub>0</sub>   | BM                        | Betel quid chewing                    | N>T                      | -                           |
| 46     | 226         | 55F      | T <sub>4</sub> N <sub>2</sub> M <sub>0</sub>   | BM                        | Nil                                   | N<T                      | N=T (WB)                    |
| 47     | 227         | 28M      | T <sub>1</sub> N <sub>1</sub> M <sub>0</sub>   | BM                        | Tobacco chewing and smoking           | ns                       | -                           |
| 48     | 228         | 54F      | T <sub>2</sub> N <sub>0</sub> M <sub>0</sub>   | BM                        | Tobacco chewing                       | N<T                      | -                           |
| 49     | 231         | 58M      | T <sub>1</sub> N <sub>1</sub> M <sub>0</sub>   | Tongue                    | Nil                                   | N>T                      | -                           |
| 50     | 232         | 38M      | T <sub>1</sub> N <sub>0</sub> M <sub>0</sub>   | Soft palate               | Tobacco chewing and smoking           | N>T                      | -                           |
| 51     | 233         | 50F      | T <sub>2</sub> N <sub>0</sub> M <sub>0</sub>   | BM                        | Tobacco chewing                       | N<T                      | N<T (WB)                    |
| 52     | 234         | 58M      | T <sub>2</sub> N <sub>0</sub> M <sub>0</sub>   | Mandible and tongue       | Betel nut and betel quid chewing      | N<T                      | -                           |
